# Supplementary material
Source: ML conference proceedings conference paper supplement (https://openaccess.thecvf.com/content/ICCV2023/html/Choi_ORC_Network_Group-based_ICCV_2023_paper.html)
Supplement: Supplementary file 1 [file Choi_ORC_Network_Group-based_ICCV_2023_supplemental.pdf]

# Supplementary Material for ORC: Network Group-based Knowledge Distillation using Online Role Change

Junyong Choi<sup>1,2</sup>, Hyeon Cho<sup>1</sup>, Seokhwa Cheung<sup>1</sup>, and Wonjun Hwang<sup>1,3</sup>

<sup>1</sup>Ajou University, Korea, <sup>2</sup>Hyundai Motor Company, <sup>3</sup>Naver AI Lab

chldusxkr@hyundai.com, {ch0104, shjeong008, wjhwang}@ajou.ac.kr

## 1. Implementation Details on Multiple Networks

In this supplementary material, we describe the details of the networks used in our experiments in Tables 2 and 3 of the main paper such as ResNet[1], WRN[5], VGG[4].

We explain the details of used networks according to experimental settings. As introduced in the main paper, we experimented with the teacher network and the student network in two cases. In the first case, the teacher network and the student network have the same architecture, and in the second case, networks with a different architecture are used.

### 1.1. Similar Architecture Networks for CIFAR-100

We conducted the experiment by dividing the case where the structure of the teacher network and the student network are the same into a total of 7 types. The networks used in the experiment of Table 2 in main paper are described in Table 1, and a general ResNet, a ResNet with increased channels, a general wide residual network, and VGG were used.

Table 1. Networks of Similar Architecture

| Teacher    |            |            |          | Student   |
|------------|------------|------------|----------|-----------|
| WRN40_2    | WRN34_2    | WRN28_2    |          | WRN16_2   |
| WRN40_2    | WRN40_1    | WRN40_1    |          | WRN40_1   |
| ResNet56   | ResNet44   | ResNet32   |          | ResNet20  |
| Resnet110  | ResNet56   | ResNet44   | ResNet32 | ResNet20  |
| ResNet110  | ResNet56   | ResNet44   |          | ResNet32  |
| ResNet32x4 | ResNet26x4 | ResNet14x4 |          | ResNet8x4 |
| VGG13      | VGG11      | VGG9       |          | VGG8      |

### 1.2. Different Architecture Networks for CIFAR-100

We conducted the experiment by dividing the case where the structure of the teacher network and the student network are different into 6 types. The networks used for the experiment are described in Table 2, and the network used for the teacher used the same

network as the networks tested in the same case, but ShuffleNetV1[6], ShuffleNetV2[2], and MobileNetV2[3] were additionally used as the student networks.

Table 2. Networks of Different Architecture

| Teacher    |            |            | Student      |
|------------|------------|------------|--------------|
| ResNet50   | ResNet34   | ResNet18   | MobileNetV2  |
| ResNet50   | ResNet34   | ResNet32   | VGG8         |
| ResNet32x4 | ResNet26x4 | ResNet14x4 | ShuffleNetV1 |
| ResNet32x4 | ResNet26x4 | ResNet14x4 | ShuffleNetV2 |
| WRN40_2    | WRN34_2    | WRN28_2    | ShuffleNetV1 |
| VGG13      | VGG11      | VGG9       | MobileNetV2  |

### 1.3. Network Architectures for ImageNet

This section explains the networks' architecture used in ImageNet. This experiment was conducted using ResNet and designed using 4 residual blocks. Referring to Table 3, unlike the frequently used ResNet34 and ResNet18, ResNet28 and ResNet22 are newly designed to have the largest number of the 3rd block, which is a feature of ResNet.

Table 3. ResNet for ImageNet Dataset

| ResNet34                 |    | ResNet28                 |    | ResNet22                 |    | ResNet18                 |    |
|--------------------------|----|--------------------------|----|--------------------------|----|--------------------------|----|
| Conv7x7, 64<br>BN, ReLU  |    |                          |    |                          |    |                          |    |
| Conv3x3, 64<br>BN, ReLU  | x3 | Conv3x3, 64<br>BN, ReLU  | x3 | Conv3x3, 64<br>BN, ReLU  | x2 | Conv3x3, 64<br>BN, ReLU  | x2 |
| Conv3x3, 64<br>BN, ReLU  |    | Conv3x3, 64<br>BN, ReLU  |    | Conv3x3, 64<br>BN, ReLU  |    | Conv3x3, 64<br>BN, ReLU  |    |
| Conv3x3, 128<br>BN, ReLU | x4 | Conv3x3, 128<br>BN, ReLU | x3 | Conv3x3, 128<br>BN, ReLU | x3 | Conv3x3, 128<br>BN, ReLU | x2 |
| Conv3x3, 128<br>BN, ReLU |    | Conv3x3, 128<br>BN, ReLU |    | Conv3x3, 128<br>BN, ReLU |    | Conv3x3, 128<br>BN, ReLU |    |
| Conv3x3, 256<br>BN, ReLU | x6 | Conv3x3, 256<br>BN, ReLU | x4 | Conv3x3, 256<br>BN, ReLU | x3 | Conv3x3, 256<br>BN, ReLU | x2 |
| Conv3x3, 256<br>BN, ReLU |    | Conv3x3, 256<br>BN, ReLU |    | Conv3x3, 256<br>BN, ReLU |    | Conv3x3, 256<br>BN, ReLU |    |
| Conv3x3, 512<br>BN, ReLU | x3 | Conv3x3, 512<br>BN, ReLU | x3 | Conv3x3, 512<br>BN, ReLU | x2 | Conv3x3, 512<br>BN, ReLU | x2 |
| Conv3x3, 512<br>BN, ReLU |    | Conv3x3, 512<br>BN, ReLU |    | Conv3x3, 512<br>BN, ReLU |    | Conv3x3, 512<br>BN, ReLU |    |
| AveragePool              |    |                          |    |                          |    |                          |    |
| FC-100                   |    |                          |    |                          |    |                          |    |
| Softmax                  |    |                          |    |                          |    |                          |    |

## 1.4. Network Architectures for CIFAR-100

In this section, the details of the networks' architecture used in the CIFAR-100 experiments are described. The networks used in these experiments include commonly used networks such as ResNet56 and ResNet32, but there are additionally designed networks such as ResNet44 and ResNet14x4 to use multi-teacher networks.

**ResNet.** We use standard ResNet and ResNetx4 which increases the number of channels by 4 times in the experiment. For the structure of the networks, various models with different depths are designed by changing the total number of layers by changing the number of blocks. The number of layers of the network are designed while maintaining the structure that takes a large number of third blocks. Referring to Table 4, the contents of five standard ResNet and four ResNetx4 are shown. Unlike the architecture of ResNet described above, the networks used in the CIFAR dataset consist of three blocks.

Table 4. ResNet for CIFAR-100

| ResNet110                                            |     | ResNet56                                             |    | ResNet44                                             |    | ResNet32                                             |    | ResNet20                                           |    |
|------------------------------------------------------|-----|------------------------------------------------------|----|------------------------------------------------------|----|------------------------------------------------------|----|----------------------------------------------------|----|
| Conv3x3, 16<br>BN, ReLU                              |     |                                                      |    |                                                      |    |                                                      |    |                                                    |    |
| Conv3x3, 16<br>BN, ReLU<br>Conv3x3, 16<br>BN, ReLU   | x18 | Conv3x3, 16<br>BN, ReLU<br>Conv3x3, 16<br>BN, ReLU   | x9 | Conv3x3, 16<br>BN, ReLU<br>Conv3x3, 16<br>BN, ReLU   | x7 | Conv3x3, 16<br>BN, ReLU<br>Conv3x3, 16<br>BN, ReLU   | x5 | Conv3x3, 16<br>BN, ReLU<br>Conv3x3, 16<br>BN, ReLU | x3 |
| Conv3x3, 32<br>BN, ReLU<br>Conv3x3, 32<br>BN, ReLU   | x18 | Conv3x3, 32<br>BN, ReLU<br>Conv3x3, 32<br>BN, ReLU   | x9 | Conv3x3, 32<br>BN, ReLU<br>Conv3x3, 32<br>BN, ReLU   | x7 | Conv3x3, 32<br>BN, ReLU<br>Conv3x3, 32<br>BN, ReLU   | x5 | Conv3x3, 32<br>BN, ReLU<br>Conv3x3, 32<br>BN, ReLU | x3 |
| Conv3x3, 64<br>BN, ReLU<br>Conv3x3, 64<br>BN, ReLU   | x18 | Conv3x3, 64<br>BN, ReLU<br>Conv3x3, 64<br>BN, ReLU   | x9 | Conv3x3, 64<br>BN, ReLU<br>Conv3x3, 64<br>BN, ReLU   | x7 | Conv3x3, 64<br>BN, ReLU<br>Conv3x3, 64<br>BN, ReLU   | x5 | Conv3x3, 64<br>BN, ReLU<br>Conv3x3, 64<br>BN, ReLU | x3 |
| AveragePool                                          |     |                                                      |    |                                                      |    |                                                      |    |                                                    |    |
| FC-100                                               |     |                                                      |    |                                                      |    |                                                      |    |                                                    |    |
| Softmax                                              |     |                                                      |    |                                                      |    |                                                      |    |                                                    |    |
| ResNet32x4                                           |     | ResNet26x4                                           |    | ResNet14x4                                           |    | ResNet8x4                                            |    |                                                    |    |
| Conv3x3, 32<br>BN, ReLU                              |     |                                                      |    |                                                      |    |                                                      |    |                                                    |    |
| Conv3x3, 64<br>BN, ReLU<br>Conv3x3, 64<br>BN, ReLU   | x5  | Conv3x3, 64<br>BN, ReLU<br>Conv3x3, 64<br>BN, ReLU   | x4 | Conv3x3, 64<br>BN, ReLU<br>Conv3x3, 64<br>BN, ReLU   | x2 | Conv3x3, 64<br>BN, ReLU<br>Conv3x3, 64<br>BN, ReLU   | x1 |                                                    |    |
| Conv3x3, 128<br>BN, ReLU<br>Conv3x3, 128<br>BN, ReLU | x5  | Conv3x3, 128<br>BN, ReLU<br>Conv3x3, 128<br>BN, ReLU | x4 | Conv3x3, 128<br>BN, ReLU<br>Conv3x3, 128<br>BN, ReLU | x2 | Conv3x3, 128<br>BN, ReLU<br>Conv3x3, 128<br>BN, ReLU | x1 |                                                    |    |
| Conv3x3, 256<br>BN, ReLU<br>Conv3x3, 256<br>BN, ReLU | x5  | Conv3x3, 256<br>BN, ReLU<br>Conv3x3, 256<br>BN, ReLU | x4 | Conv3x3, 256<br>BN, ReLU<br>Conv3x3, 256<br>BN, ReLU | x2 | Conv3x3, 256<br>BN, ReLU<br>Conv3x3, 256<br>BN, ReLU | x1 |                                                    |    |
| AveragePool                                          |     |                                                      |    |                                                      |    |                                                      |    |                                                    |    |
| FC-100                                               |     |                                                      |    |                                                      |    |                                                      |    |                                                    |    |
| Softmax                                              |     |                                                      |    |                                                      |    |                                                      |    |                                                    |    |

**Wide ResNet.** We use a standard Wide Residual Network (WRN) for the experiment. Like ResNet, various networks are designed to have different depths by changing the total layer by changing the number of blocks. Referring to Table 5, the architectures of WRN40\_2 to WRN16\_2 used as the teacher network

and WRN40\_1 used as the student network are shown. Also, like ResNet, each cell means one Residual block, and it consists of consecutively as many as the number on the right.

Table 5. Wide ResNet for CIFAR-100

| WRN40.2                                              |    | WRN34.2                                              |    | WRN28.2                                              |    | WRN16.2                                              |    | WRN40.1                                            |    |
|------------------------------------------------------|----|------------------------------------------------------|----|------------------------------------------------------|----|------------------------------------------------------|----|----------------------------------------------------|----|
| BN, ReLU<br>Conv3x3, 16                              |    |                                                      |    |                                                      |    |                                                      |    |                                                    |    |
| BN, ReLU<br>Conv3x3, 32<br>BN, ReLU<br>Conv3x3, 32   | x6 | BN, ReLU<br>Conv3x3, 32<br>BN, ReLU<br>Conv3x3, 32   | x5 | BN, ReLU<br>Conv3x3, 32<br>BN, ReLU<br>Conv3x3, 32   | x4 | BN, ReLU<br>Conv3x3, 32<br>BN, ReLU<br>Conv3x3, 32   | x2 | BN, ReLU<br>Conv3x3, 16<br>BN, ReLU<br>Conv3x3, 16 | x6 |
| BN, ReLU<br>Conv3x3, 64<br>BN, ReLU<br>Conv3x3, 64   | x6 | BN, ReLU<br>Conv3x3, 64<br>BN, ReLU<br>Conv3x3, 64   | x5 | BN, ReLU<br>Conv3x3, 64<br>BN, ReLU<br>Conv3x3, 64   | x4 | BN, ReLU<br>Conv3x3, 64<br>BN, ReLU<br>Conv3x3, 64   | x2 | BN, ReLU<br>Conv3x3, 32<br>BN, ReLU<br>Conv3x3, 32 | x6 |
| BN, ReLU<br>Conv3x3, 128<br>BN, ReLU<br>Conv3x3, 128 | x6 | BN, ReLU<br>Conv3x3, 128<br>BN, ReLU<br>Conv3x3, 128 | x5 | BN, ReLU<br>Conv3x3, 128<br>BN, ReLU<br>Conv3x3, 128 | x4 | BN, ReLU<br>Conv3x3, 128<br>BN, ReLU<br>Conv3x3, 128 | x2 | BN, ReLU<br>Conv3x3, 64<br>BN, ReLU<br>Conv3x3, 64 | x6 |
| BN, ReLU                                             |    |                                                      |    |                                                      |    |                                                      |    |                                                    |    |
| AveragePool                                          |    |                                                      |    |                                                      |    |                                                      |    |                                                    |    |
| FC-100                                               |    |                                                      |    |                                                      |    |                                                      |    |                                                    |    |
| Softmax                                              |    |                                                      |    |                                                      |    |                                                      |    |                                                    |    |

**VGG.** We use a standard VGG for the experiment. Referring to Table 6, the network architectures from VGG13 to VGG8 are distinguished by the difference in layer depth. VGG13, VGG11, and VGG9 are used as the teacher network, and VGG8 is used as the student network. The deeper the model, the more convolution operations with high channels are used.

Table 6. VGG for CIFAR-100

| VGG13                    |    | VGG11                    |    | VGG9                     |    | VGG8                     |    |
|--------------------------|----|--------------------------|----|--------------------------|----|--------------------------|----|
| Conv3x3, 64<br>BN, ReLU  | x2 | Conv3x3, 64<br>BN, ReLU  | x1 | Conv3x3, 64<br>BN, ReLU  | x1 | Conv3x3, 64<br>BN, ReLU  | x1 |
| Conv3x3, 128<br>BN, ReLU | x2 | Conv3x3, 128<br>BN, ReLU | x1 | Conv3x3, 128<br>BN, ReLU | x1 | Conv3x3, 128<br>BN, ReLU | x1 |
| Conv3x3, 256<br>BN, ReLU | x2 | Conv3x3, 256<br>BN, ReLU | x2 | Conv3x3, 256<br>BN, ReLU | x1 | Conv3x3, 256<br>BN, ReLU | x1 |
| Conv3x3, 512<br>BN, ReLU | x2 | Conv3x3, 512<br>BN, ReLU | x2 | Conv3x3, 512<br>BN, ReLU | x1 | Conv3x3, 512<br>BN, ReLU | x1 |
| Conv3x3, 512<br>BN, ReLU | x2 | Conv3x3, 512<br>BN, ReLU | x2 | Conv3x3, 512<br>BN, ReLU | x2 | Conv3x3, 512<br>BN, ReLU | x1 |
| MaxPool                  |    |                          |    |                          |    |                          |    |
| FC-512                   |    |                          |    |                          |    |                          |    |
| FC-512                   |    |                          |    |                          |    |                          |    |
| FC-512                   |    |                          |    |                          |    |                          |    |
| Softmax                  |    |                          |    |                          |    |                          |    |

## 2. Effectiveness of Online Role Change

### 2.1. Reducing False Knowledge After ORC

After applying the online role change, we measured the change in performance of the networks included in the student group. As a result, in Fig. 1, it can be confirmed that the overall performance of the student network has improved for each class that was difficult.

### 2.2. Online Role-Change at every iteration

We perform online role change at every iteration to utilize the advantages of student networks for each mini-batch. In other words, for each mini-batch, false

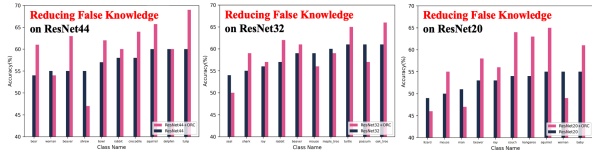

Figure 1. Accuracy improvement of student groups on difficult samples after ORC.

knowledge contamination by temporary teachers can be prevented by taking advantage of student networks. Therefore, we utilize the network which shows most confidence at specific mini-batch as a temporary teacher. Further, we compare the performance of different iterations per epoch to analyze the advantage of the number of switching. As shown in Table 7, the student network shows better accuracy as the number of role changes increases. It can be said that the strengths of students are highlighted and used as much as possible.

Table 7. ImageNet Top-1 ERROR on the num. of iterations.

| Model    | 4,688 iters. | 9,375 iters. | 18,750 iters. |
|----------|--------------|--------------|---------------|
| ResNet18 | 29.48        | 28.72        | <b>28.00</b>  |

**Limitation.** We note that the multiple network-based KD results in more computational complexity in training, but it does not affect the complexity of the student network.

## References

- [1] K. He, X. Zhang, S. Ren, and J. Sun. Deep residual learning for image recognition. *IEEE Conf. on Computer Vision and Pattern Recognition*, pages 770–778, Jun. 2016. [1](#)
- [2] N. Ma, X. Zhang, H. Zheng, and J. Sun. Shufflenet v2: Practical guidelines for efficient cnn architecture design. In *Proceedings of the European conference on computer vision (ECCV)*, pages 116–131, 2018. [1](#)
- [3] M. Sandler, A. Howard, M. Zhu, A. Zhmoginov, and L. Chen. Mobilenetv2: Inverted residuals and linear bottlenecks. In *Proceedings of the IEEE conference on computer vision and pattern recognition*, pages 4510–4520, 2018. [1](#)
- [4] K. Simonyan and A. Zisserman. Very deep convolutional networks for large-scale image recognition. *arXiv preprint arXiv:1409.1556*, 2014. [1](#)
- [5] S. Zagoruyko and N. Komodakis. Wide residual networks. *British Machine Vision Conference*, pages 87.1–87.12, Sept. 2016. [1](#)
- [6] X. Zhang, X. Zhou, M. Lin, and J. Sun. Shufflenet: An extremely efficient convolutional neural network for mobile devices. In *Proceedings of the IEEE conference on computer vision and pattern recognition*, pages 6848–6856, 2018. [1](#)
